# Supplementary material for: Matrix isolation, time-resolved IR, and computational study of the photochemistry of benzoyl azideDedicated to Professor Dr Z. R. Grabowski and Professor Dr J. Wirz on the occasions of their 75th and 60th birthdays.Electronic supplementary information (ESI) available: Cartesian coordinates and details of the CASSCF/CASPT2 calculations, details of the excited-state calculations on formylnitrene, the full IR spectra, additional results from the TRIR experiments and two tables with results from CASPT2 calculations with different level shifts. See http://www.rsc.org/suppdata/cp/b2/b209775c/
Source: Royal Society of Chemistry journal article supplement (doi:10.1039/b209775c), 2002-12-16
Supplement: esi2.pdf [file esi2.pdf]

# **Matrix isolation, time-resolved IR, and computational study of the photochemistry of benzoyl azide**

Elena A. Pritchina and Nina P. Gritsan,\*

Institute of Chemical Kinetics and Combustion, Siberian Branch of Russian Academy of Sciences, and Novosibirsk State University, 630090 Novosibirsk, Russia

Alexander Maltsev and Thomas Bally,\*

Department of Chemistry, University of Fribourg, CH-1700 Fribourg, Switzerland

Tom Autrey

Pacific Northwest National Laboratory, Richland, Washington 99352, USA

Yonglin Liu, Yuhong Wang, and John P. Toscano\*

Department of Chemistry, Johns Hopkins University, Baltimore, MD 21218, USA

## **Supporting Information, part 2**

**Figure S1-S6 and Table S1-S2**

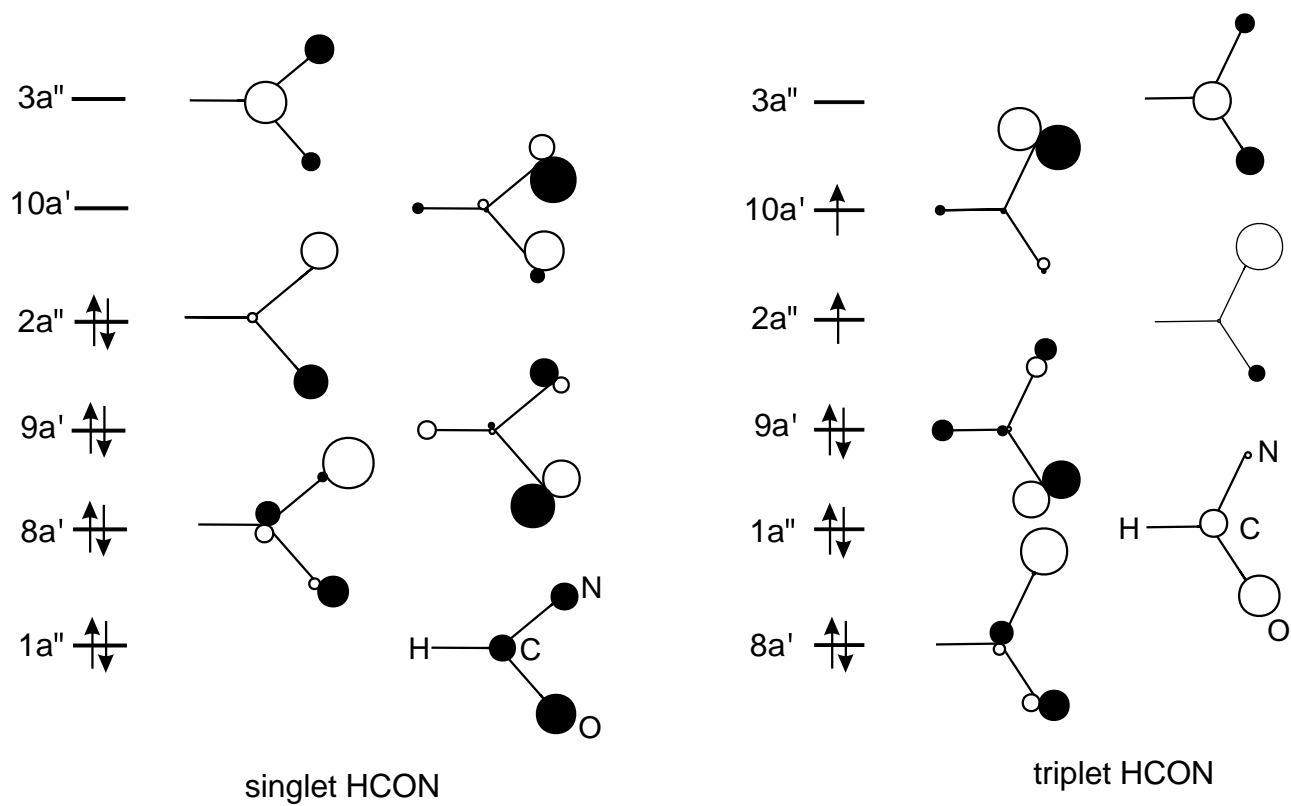

Figure S1: CASSCF orbitals of singlet and triplet HCON contained in the active space of the calculations whose results are listed in Table T1 and T2, respectively.

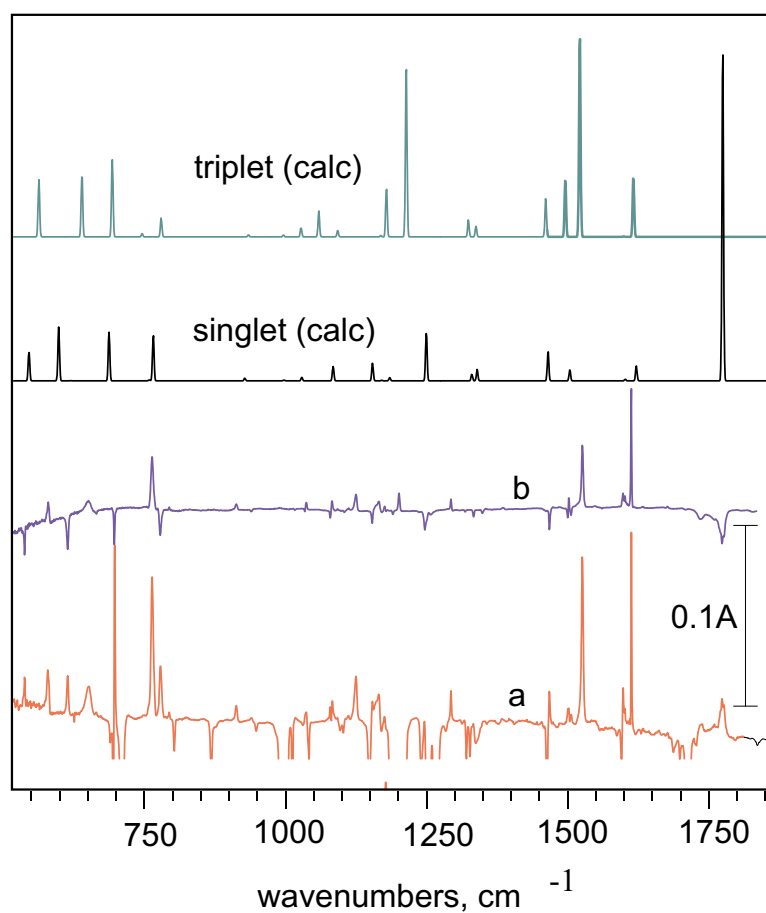

Figure S2: Changes in IR spectra upon 254 nm irradiation of benzoyl azide (1b) in an Ar matrix at 12 K for 2 min (a) and subsequent 313 nm photolysis for 8 min (b). The top two traces show the IR spectra of singlet and triplet benzonitrene calculated by the B3LYP/6-31G\* and scaled by 0.97.

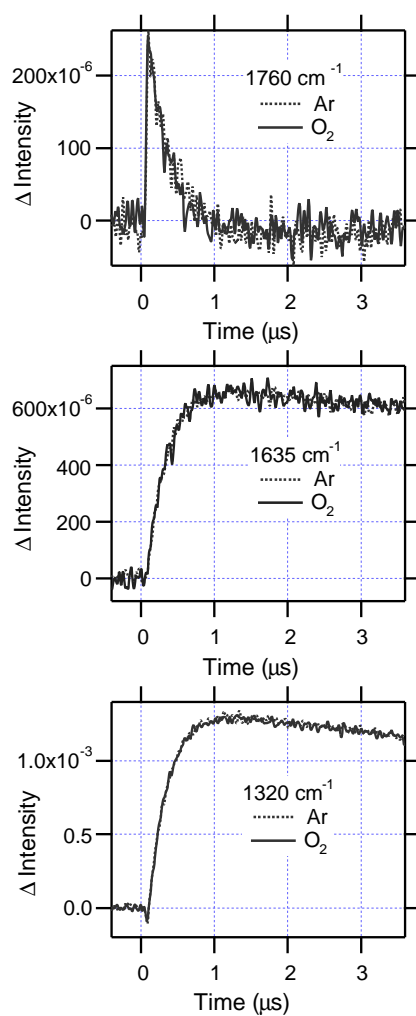

Figure S3. Kinetic traces observed at 1760, 1635, and 1320  $cm^{-1}$  following 266 nm laser photolysis (5 ns, 2 mJ) of azide **1b** (3.3. mM) in argon- and oxygen-saturated acetonitrile- $d_3$ .

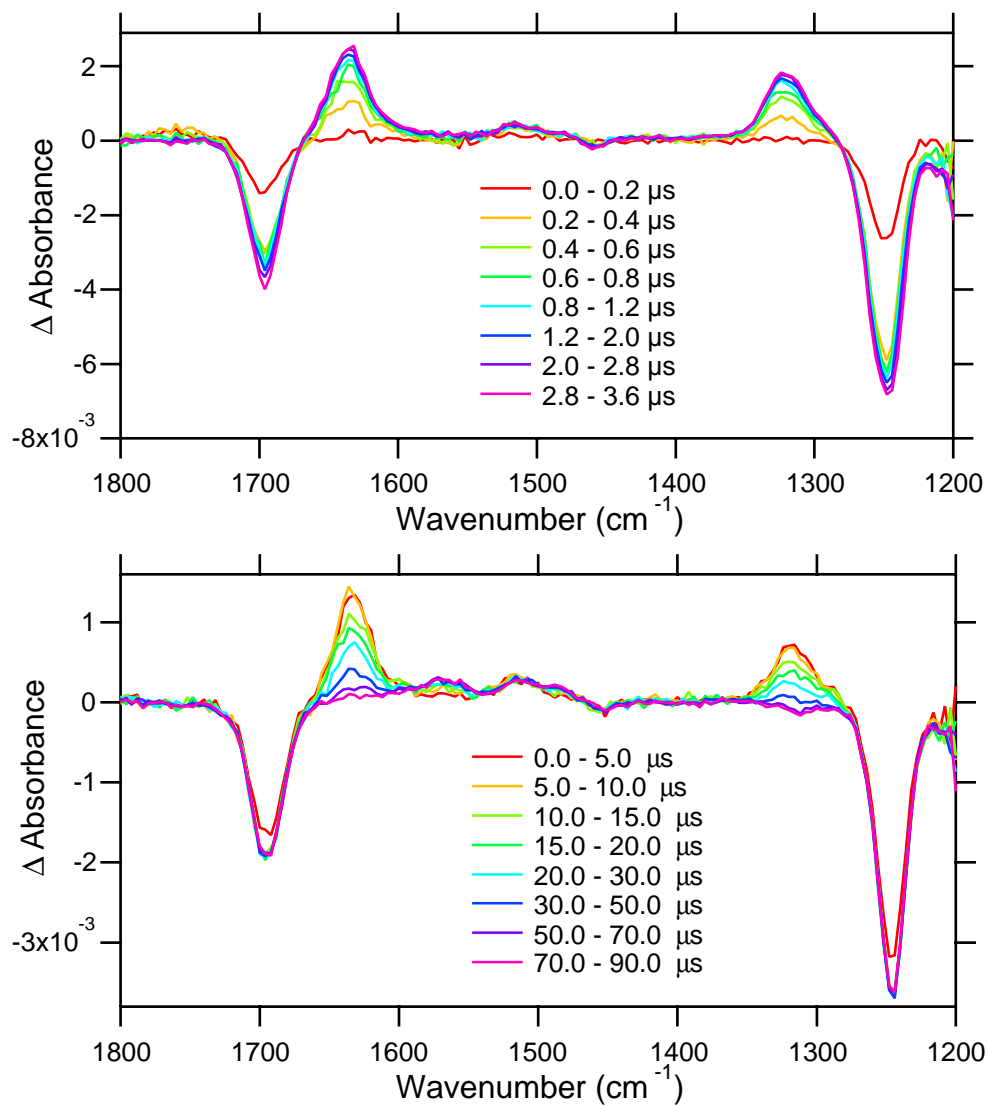

Figure S4. TRIR difference spectra averaged over the timescales indicated following 266 nm laser photolysis (5 ns, 2 mJ) of azide **1b** (3.3 mM) in argon-saturated acetonitrile- $d_3$ .

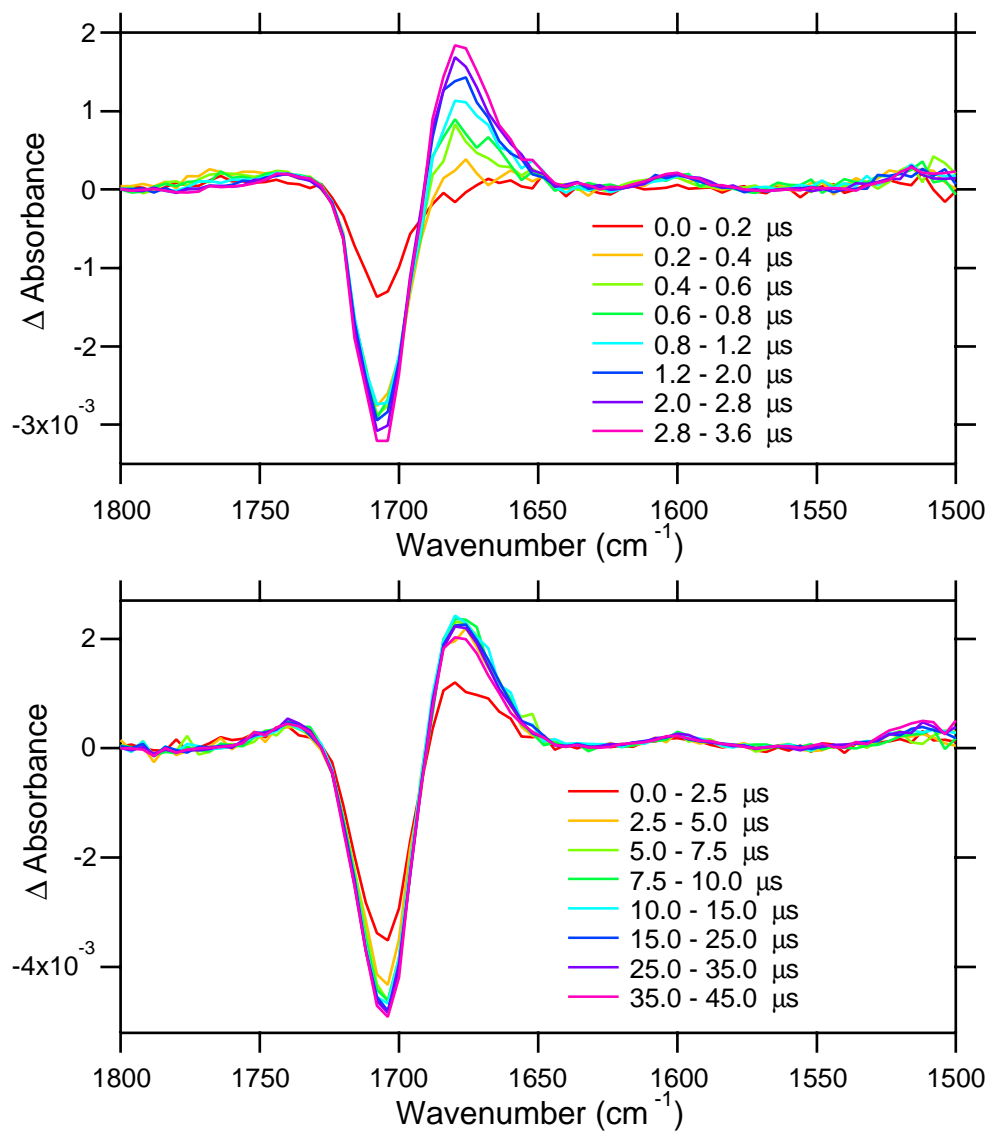

Figure S5. TRIR difference spectra averaged over the timescales indicated following 266 nm laser photolysis (5 ns, 2 mJ) of azide **1b** (3.3 mM) in argon-saturated cyclohexane.

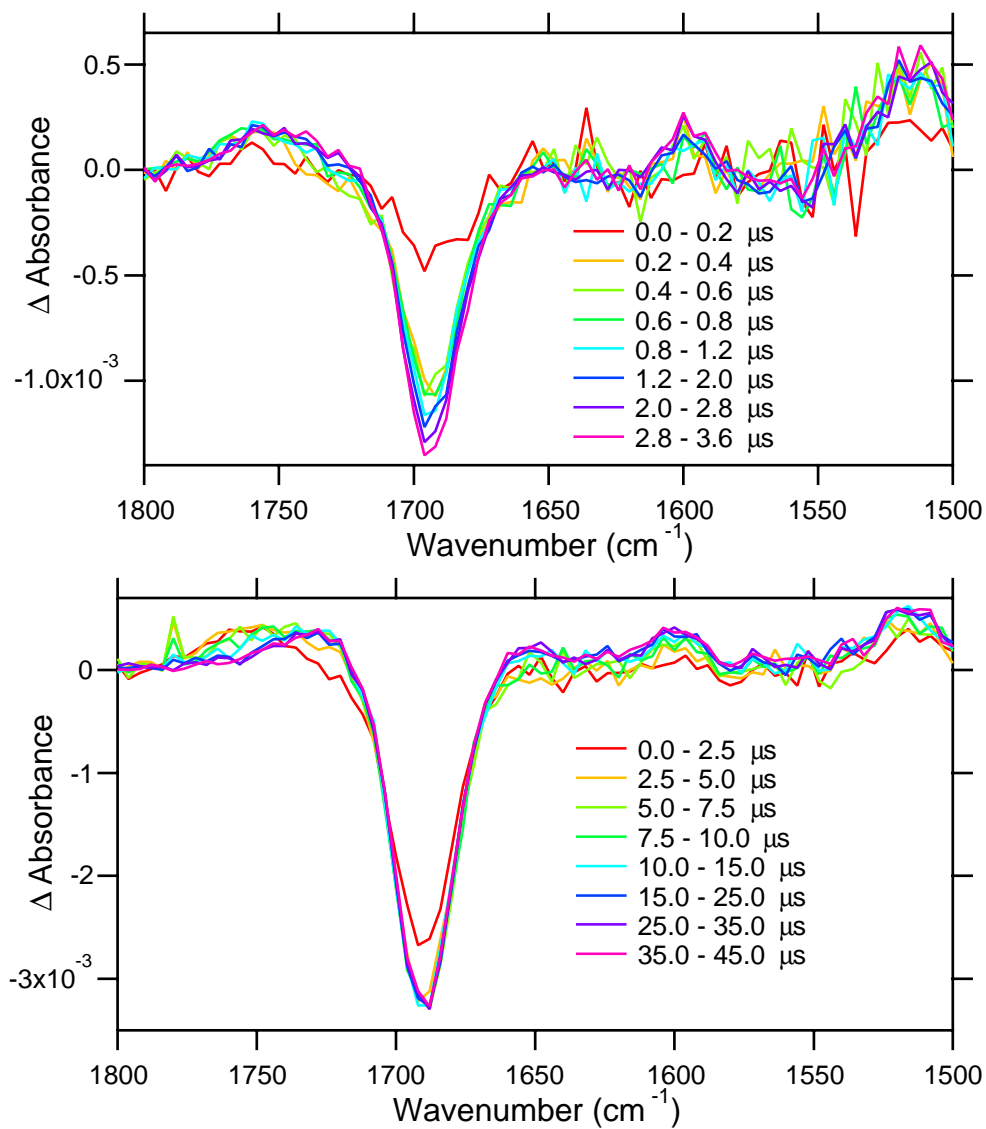

Figure S6. TRIR difference spectra averaged over the timescales indicated following 266 nm laser photolysis (5 ns, 2 mJ) of azide **1b** (3.3 mM) in argon-saturated dichloromethane.

Table T1. Vertical excitation energies of singlet formylnitrene calculated by the CASSCF(8,7)<sup>a</sup> / CASPT2 method at the B3LYP/6-31G\* geometry.<sup>b,c</sup>

| state              | $\Delta E_{\text{CASSCF}}$ ,<br>eV | $\Delta E_{\text{CASPT2}}$<br>eV | ref.<br>weight <sup>d</sup> | $\lambda$ ,<br>nm | $f^e$                | Major configurations <sup>f</sup>                                                                                                                    |
|--------------------|------------------------------------|----------------------------------|-----------------------------|-------------------|----------------------|------------------------------------------------------------------------------------------------------------------------------------------------------|
| 1 <sup>1</sup> A'  | 0.0                                | 0.0                              | 0.89                        |                   |                      | 79% of ground configuration                                                                                                                          |
| 1 <sup>1</sup> A'' | 2.51                               | 2.32                             | 0.88                        | 534               | $2.1 \times 10^{-4}$ | 81%: 2a'' $\rightarrow$ 10a'<br>10%: 1a'' $\rightarrow$ 10a'                                                                                         |
| 2 <sup>1</sup> A'  | 4.78                               | 4.78                             | 0.86                        | 259               | $4.1 \times 10^{-3}$ | 42%: 2a'' $\rightarrow$ 3a''<br>20%: 9a' $\rightarrow$ 10a'<br>19%: 2(2a'' $\rightarrow$ 10a')                                                       |
| 3 <sup>1</sup> A'  | 5.81                               | 5.77                             | 0.88                        | 215               | $3.0 \times 10^{-3}$ | 69%: 2(2a'' $\rightarrow$ 10a')<br>11%: 2a'' $\rightarrow$ 3a''                                                                                      |
| 2 <sup>1</sup> A'' | 6.14                               | 5.84                             | 0.85                        | 212               | $4.5 \times 10^{-5}$ | 43%: 1a'' $\rightarrow$ 10a'<br>17%: 2a'' $\rightarrow$ 10a'<br>+9a' $\rightarrow$ 10a'<br>17%: 2a'' $\rightarrow$ 3a''<br>+2a'' $\rightarrow$ 10a'  |
| 3 <sup>1</sup> A'' | 7.14                               | 7.06                             | 0.86                        | 176               | $7.4 \times 10^{-5}$ | 38%: 2a'' $\rightarrow$ 3a'' +<br>2a'' $\rightarrow$ 10a'<br>26%: 9a' $\rightarrow$ 3a''<br>18%: 2a'' $\rightarrow$ 10a'<br>+ 9a' $\rightarrow$ 10a' |

<sup>a</sup> Active space includes 4 a'' and 3 a' orbitals shown in Figure S1; <sup>b</sup> Cartesian coordinates are given in Part 1 of the supporting information; <sup>c</sup> details of the calculation are given in Section B of Part 1 of the supporting information; <sup>d</sup>weight of the zero-order CASSCF wavefunction in the CASPT2 expansion; <sup>e</sup> Oscillator strength for electronic transition, based on the CASSCF wave functions and the CASPT2 energy differences. <sup>f</sup> In a (8,7) CASSCF wavefunction; orbitals see Figure S1



Table T2. Vertical excitation energies of triplet formylnitrene calculated by the CASSCF(8,7)<sup>a</sup> / CASPT2 method at the B3LYP/6-31G\* geometry. <sup>b,c</sup>

| state              | $\Delta E_{\text{CASSCF}}$ ,<br>eV | $\Delta E_{\text{CASPT2}}$ , <sup>d</sup><br>eV | ref.<br>weight <sup>e</sup> | $\lambda$ ,<br>nm | $f$ <sup>f</sup>     | Major configurations <sup>g</sup>                                                             |
|--------------------|------------------------------------|-------------------------------------------------|-----------------------------|-------------------|----------------------|-----------------------------------------------------------------------------------------------|
| 1 <sup>3</sup> A'' | 0.0                                | 0.0                                             | 0.88                        |                   |                      | 88% of ground configuration                                                                   |
| 1 <sup>3</sup> A'  | 1.07                               | 1.09                                            | 0.88                        | 1137              | 3.3×10 <sup>-4</sup> | 83%: 9a'→2a''                                                                                 |
| 2 <sup>3</sup> A'' | 3.26                               | 2.84                                            | 0.87                        | 437               | 2.5×10 <sup>-3</sup> | 85%: 9a'→10a'                                                                                 |
| 2 <sup>3</sup> A'  | 4.18                               | 3.84                                            | 0.87                        | 323               | 7.2×10 <sup>-3</sup> | 73%: 8a'→2a''                                                                                 |
| 3 <sup>3</sup> A'' | 4.09                               | 4.23                                            | 0.88                        | 293               | 1.8×10 <sup>-2</sup> | 63%: 1a''→2a''<br>20%: 2a''→3a''                                                              |
| 3 <sup>3</sup> A'  | 5.20                               | 5.61                                            | 0.88                        | 221               | 8.0×10 <sup>-6</sup> | 42%: 10a'→3a''<br>+9a'→10a'<br>18%: 10a'→3a''<br>16%: 2a''→3a''<br>+9a'→2a''<br>11%: 9a'→3a'' |

<sup>a</sup> Active space includes 4 a'' and 3 a' orbitals shown in Figure S2; <sup>b</sup> Cartesian coordinates are given in Part 1 of the supporting information; <sup>c</sup> details of the calculation are given in Section B of Part 1 of the supporting information; <sup>d</sup> Calculated with a level shift of 0.25; <sup>e</sup> weight of the zero-order CASSCF wavefunction in the CASPT2 expansion; <sup>f</sup> Oscillator strength for electronic transition, based on the CASSCF wave functions and the CASPT2 energy differences. <sup>g</sup> In a (8,7) CASSCF wavefunction; <sup>g</sup> orbitals see Figure S2

Table T3. Dependence of energy and reference weight of CASPT2 states on the level shift for singlet PhCON.<sup>a</sup>

| CASPT2 states                  | 1 <sup>1</sup> A' | 1 <sup>1</sup> A'' | 3 <sup>1</sup> A' | 2 <sup>1</sup> A' | 2 <sup>1</sup> A'' | 3 <sup>1</sup> A'' |
|--------------------------------|-------------------|--------------------|-------------------|-------------------|--------------------|--------------------|
| <b>level shift = 0.00 a.u.</b> |                   |                    |                   |                   |                    |                    |
| E <sub>CASPT2</sub> , H        | -398.439233       | -398.286699        | -398.285664       | -398.257641       | -398.439233        | -398.249223        |
| ΔE <sub>CASPT2</sub> , eV      | 0.0               | 2.408              | 4.151             | 4.179             | 4.941              | 5.170              |
| Ref. weight                    | 0.728             | 0.722              | <b>0.357</b>      | <b>0.601</b>      | <b>0.612</b>       | <b>0.332</b>       |
| <b>level shift = 0.05 a.u.</b> |                   |                    |                   |                   |                    |                    |
| E <sub>CASPT2</sub> , H        | -398.438859       | -398.350346        | -398.296945       | -398.285423       | -398.259717        | -398.260989        |
| ΔE <sub>CASPT2</sub> , eV      | 0.0               | 2.409              | 3.862             | 4.175             | 4.875              | 4.840              |
| Ref. weight                    | 0.736             | 0.730              | <b>0.684</b>      | 0.703             | 0.703              | <b>0.651</b>       |
| <b>level shift = 0.10 a.u.</b> |                   |                    |                   |                   |                    |                    |
| E <sub>CASPT2</sub> , H        | -398.437806       | -398.349226        | -398.292506       | -398.285868       | -398.288911        | -398.279092        |
| ΔE <sub>CASPT2</sub> , eV      | 0.0               | 2.410              | 3.954             | 4.134             | 4.052              | 4.319              |
| Ref. weight                    | 0.744             | 0.738              | 0.716             | 0.713             | <b>0.592</b>       | <b>0.614</b>       |
| <b>level shift = 0.15 a.u.</b> |                   |                    |                   |                   |                    |                    |
| E <sub>CASPT2</sub> , H        | -398.436165       | -398.347488        | -398.289290       | -398.280982       | -398.255046        | -398.278256        |
| ΔE <sub>CASPT2</sub> , eV      | 0.0               | 2.413              | 3.997             | 4.223             | 4.929              | 4.297              |
| Ref. weight                    | 0.751             | 0.746              | 0.730             | 0.734             | 0.735              | <b>0.647</b>       |
| <b>level shift = 0.20 a.u.</b> |                   |                    |                   |                   |                    |                    |
| E <sub>CASPT2</sub> , H        | -398.434014       | -398.345229        | -398.285946       | -398.277806       | -398.252153        | -398.248234        |
| ΔE <sub>CASPT2</sub> , eV      | 0.0               | 2.416              | 4.029             | 4.251             | 4.949              | 5.055              |
| Ref. weight                    | 0.758             | 0.753              | 0.740             | 0.744             | 0.744              | 0.739              |
| <b>level shift = 0.25 a.u.</b> |                   |                    |                   |                   |                    |                    |
| E <sub>CASPT2</sub> , H        | -398.431418       | -398.342507        | -398.282331       | -398.274384       | -398.248815        | -398.244385        |
| ΔE <sub>CASPT2</sub> , eV      | 0.0               | 2.419              | 4.057             | 4.273             | 4.969              | 5.089              |
| Ref. weight                    | 0.765             | 0.760              | 0.749             | 0.753             | 0.753              | 0.749              |
| <b>level shift = 0.30 a.u.</b> |                   |                    |                   |                   |                    |                    |
| E <sub>CASPT2</sub> , H        | -398.428435       | -398.339388        | -398.278433       | -398.270660       | -398.245169        | -398.240504        |
| ΔE <sub>CASPT2</sub> , eV      | 0.0               | 2.423              | 4.082             | 4.293             | 4.987              | 5.114              |
| Ref. weight                    | 0.771             | 0.767              | 0.757             | 0.761             | 0.760              | 0.757              |

<sup>a</sup> The results with level shift 0.25 a.u. are listed in Table 3 of the manuscript

Table T4. Dependence of energy and reference weight of CASPT2 states on the level shift for triplet PhCON<sup>a</sup>

| CASPT2 states                  | 1 <sup>3</sup> A" ground state | 1 <sup>3</sup> A' | 3 <sup>3</sup> A" | 2 <sup>3</sup> A" | 4 <sup>3</sup> A" | 5 <sup>3</sup> A" | 6 <sup>3</sup> A" | 7 <sup>3</sup> A" | 2 <sup>3</sup> A' | 3 <sup>3</sup> A' |
|--------------------------------|--------------------------------|-------------------|-------------------|-------------------|-------------------|-------------------|-------------------|-------------------|-------------------|-------------------|
| <b>level shift = 0.00 a.u.</b> |                                |                   |                   |                   |                   |                   |                   |                   |                   |                   |
| E <sub>CASPT2</sub> , H        | -398.456137                    | -398.396656       | -398.345397       | -398.342861       | -398.339915       | -398.317860       | -398.300386       | -398.294458       | -398.291843       | -398.266949       |
| ΔE <sub>CASPT2</sub> , eV      | 0.0                            | 1.619             | 3.013             | 3.082             | 3.163             | 3.763             | 4.238             | 4.400             | 4.471             | 5.148             |
| Ref. weight                    | 0.709                          | 0.717             | 0.689             | 0.654             | 0.684             | <b>0.201</b>      | <b>0.591</b>      | <b>0.616</b>      | 0.683             | <b>0.594</b>      |
| <b>level shift = 0.05 a.u.</b> |                                |                   |                   |                   |                   |                   |                   |                   |                   |                   |
| E <sub>CASPT2</sub> , H        | -398.455669                    | -398.396151       | -398.345069       | -408.543683       | -398.401763       | -398.329051       | -398.299337       | -398.294969       | -398.291811       | -398.267337       |
| ΔE <sub>CASPT2</sub> , eV      | 0.0                            | 1.620             | 3.010             | -                 | 1.467             | 3.445             | 4.254             | 4.373             | 4.459             | 5.125             |
| Ref. weight                    | 0.719                          | 0.730             | 0.705             | <b>0.005</b>      | <b>0.373</b>      | <b>0.576</b>      | 0.699             | <b>0.672</b>      | 0.718             | 0.716             |
| <b>level shift = 0.10 a.u.</b> |                                |                   |                   |                   |                   |                   |                   |                   |                   |                   |
| E <sub>CASPT2</sub> , H        | -398.454394                    | -398.394971       | -398.343531       | -398.358915       | -398.338882       | -401.536226       | -398.297824       | -398.395801       | -398.291455       | -398.266900       |
| ΔE <sub>CASPT2</sub> , eV      | 0.0                            | 1.617             | 3.017             | 2.598             | 3.143             | -                 | 4.260             | 1.594             | 4.434             | 5.102             |
| Ref. weight                    | 0.728                          | 0.738             | 0.715             | <b>0.675</b>      | 0.710             | <b>0.029</b>      | 0.710             | <b>0.391</b>      | 0.724             | 0.724             |
| <b>level shift = 0.15 a.u.</b> |                                |                   |                   |                   |                   |                   |                   |                   |                   |                   |
| E <sub>CASPT2</sub> , H        | -398.452453                    | -398.393193       | -398.341299       | -398.348611       | -398.335460       | -398.330181       | -398.296679       | -398.301511       | -398.287970       | -398.263563       |
| ΔE <sub>CASPT2</sub> , eV      | 0.0                            | 1.613             | 3.025             | 2.826             | 3.184             | 3.327             | 4.239             | 4.107             | 4.476             | 5.140             |
| Ref. weight                    | 0.736                          | 0.746             | 0.724             | 0.717             | 0.725             | <b>0.678</b>      | 0.719             | <b>0.689</b>      | 0.740             | 0.740             |
| <b>level shift = 0.20 a.u.</b> |                                |                   |                   |                   |                   |                   |                   |                   |                   |                   |
| E <sub>CASPT2</sub> , H        | -398.449950                    | -398.390893       | -398.338462       | -398.343686       | -398.332487       | -398.315235       | -398.291879       | -398.289739       | -398.285390       | -398.260777       |
| ΔE <sub>CASPT2</sub> , eV      | 0.0                            | 1.607             | 3.034             | 2.892             | 3.196             | 3.666             | 4.301             | 4.360             | 4.478             | 5.148             |
| Ref. weight                    | 0.744                          | 0.754             | 0.733             | 0.732             | 0.734             | 0.721             | 0.734             | 0.724             | 0.748             | 0.749             |
| <b>level shift = 0.25 a.u.</b> |                                |                   |                   |                   |                   |                   |                   |                   |                   |                   |
| E <sub>CASPT2</sub> , H        | -398.446967                    | -398.388141       | -398.335108       | -398.339439       | -398.329060       | -398.309074       | -398.288207       | -398.284384       | -398.282307       | -398.257706       |
| ΔE <sub>CASPT2</sub> , eV      | 0.0                            | 1.601             | 3.044             | 2.926             | 3.208             | 3.752             | 4.320             | 4.424             | 4.481             | 5.150             |
| Ref. weight                    | 0.751                          | 0.761             | 0.741             | 0.743             | 0.742             | 0.736             | 0.743             | 0.737             | 0.756             | 0.756             |
| <b>level shift = 0.30 a.u.</b> |                                |                   |                   |                   |                   |                   |                   |                   |                   |                   |
| E <sub>CASPT2</sub> , H        | -398.443572                    | -398.384995       | -398.331316       | -398.335192       | -398.325222       | -398.304014       | -398.284260       | -398.279649       | -398.278867       | -398.254247       |
| ΔE <sub>CASPT2</sub> , eV      | 0.0                            | 1.594             | 3.055             | 2.949             | 3.220             | 3.798             | 4.335             | 4.461             | 4.482             | 5.152             |
| Ref. weight                    | 0.759                          | 0.767             | 0.749             | 0.751             | 0.750             | 0.746             | 0.751             | 0.747             | 0.763             | 0.764             |
